# Supplementary material for: Metatranscriptomic Profiling Reveals the Effect of Breed on Active Rumen Eukaryotic Composition in Beef Cattle With Varied Feed Efficiency
Source: Front Microbiol. 2020 Mar 13;11:367. doi: 10.3389/fmicb.2020.00367 (PMC7082318; doi:10.3389/fmicb.2020.00367)
Supplement: Supplementary file 2 [file Table_1.xlsx]

## Sheet: Sheet1
Supplementary Table S1. Active rumen eukaryotic composition in beef cattle of three breeds and with divergent residual feed intake (RFI)
Taxonomic Classification			Relative Abundance, %							P Value
supergroup	phylum	genus	Breed			RFI		Average	SEM
			Angus	Charolais	Kinsella Composite	High	Low			Breed	RFI	Breed × RFI
unclassified Eukaryota			43.4179	43.3351	44.1068	43.4878	43.7521	43.62	0.154072	0.065	0.362	0.061
unclassified Opisthokonta			4.00602	3.85679	4.62145	4.10515	4.21769	4.16142	0.160397	0.172	0.755	0.38
unclassified SAR			0.72a	0.74a	0.50b	0.704239	0.606776	0.655508	0.0424359	0.006	0.145	0.036
unclassified Alveolata			0.10b	0.09b	0.21a	0.123869	0.15137	0.13762	0.019646	0.009	0.281	0.317
Protozoa			47.95a	49.46a	43.09b	47.9206	45.7441	46.8324	0.816617	0.002	0.132	0.124
	Ciliophora		40.2926	42.442	41.69	41.5348	41.4149	41.4748	1.42677	0.779	0.933	0.281
		unclassified Trichostomatia	25.5573	26.2535	28.9012	27.4184	26.3897	26.904	1.08559	0.468	0.805	0.284
		Ophryoscolex	6.60327	6.43376	7.62773	7.43622	6.34029	6.88825	0.422368	0.499	0.347	0.465
		Entodinium	3.5838	3.95279	4.17078	2.58b	5.23a	3.90246	0.491925	0.619	0.004	0.055
		Isotricha	3.10a	4.23a	0.23b	2.79865	2.2455	2.52208	0.537192	<0.0001	0.82	0.032
		unclassified Litostomatea	1.33a	1.50a	0.54b	1.19765	1.04875	1.1232	0.138068	0.0003	0.455	0.018
		unclassified Intramacronucleata	0.0990135	0.0431141	0.109279	0.0833235	0.0842807	0.0838021	0.0195375	0.682	0.735	0.377
		unclassified Ciliophora	0.0120344	0.0250807	0.0928194	0.02b	0.07a	0.0433115	0.016526	0.134	0.043	0.001
		uncultured Trichostomatia	0.004b	0.003b	0.008a	0.00545983	0.00456652	0.00501317	0.00103652	0.028	0.746	0.177
		other Ciliophora	0.00b	0.00b	0.01a	0.00104416	0.00438453	0.00271434	0.00161668	0.015	0.294	0.213
	Parabasalia		7.65a	7.02a	1.40b	6.38589	4.32914	5.35751	1.34795	0.032	0.369	0.57
		Tetratrichomonas	7.10a	6.46a	0.77b	5.84333	3.71389	4.77861	1.2564	0.01	0.282	0.694
		unclassified Trichomonadea	0.42a	0.42a	0.09b	0.361278	0.26013	0.310704	0.077434	0.028	0.386	0.583
		Trichomitus	0.03b	0.01b	0.32a	0.0536498	0.188067	0.120859	0.0660739	0.005	0.1	0.118
		unclassified Parabasalia	0.103976	0.115426	0.0828793	0.101758	0.0997633	0.10076	0.0216647	0.589	0.88	0.225
		unclassified Hypotrichomonadea	0.00b	0.00b	0.09a	0.0158466	0.0435658	0.0297062	0.0193859	0.012	0.246	0.33
		other Parabasalia	0.00b	0.00b	0.05a	0.01b	0.02a	0.0172064	0.0114017	0.019	0.042	0.392
Fungi			3.80b	2.51b	7.46a	3.66b	5.52a	4.59081	0.671881	0.003	0.005	0.225
	Neocallimastigomycota		1.51b	0.53b	3.94a	1.52191	2.46978	1.99584	0.436141	0.0003	0.081	0.105
		unclassified Neocallimastigaceae	0.86b	0.32b	2.73a	0.952391	1.65194	1.30216	0.304596	0.0001	0.06	0.102
		Piromyces	0.42a	0.16b	0.63a	0.334414	0.46917	0.401792	0.0730973	0.0007	0.184	0.217
		Cyllamyces	0.20b	0.04c	0.48a	0.200886	0.277321	0.239104	0.0578992	0.0001	0.152	0.054
		Neocallimastix	0.03b	0.02b	0.07a	0.0288346	0.0514226	0.0401286	0.00745739	0.009	0.096	0.321
		Pecoramyces	0.00b	0.00b	0.03a	0.01b	0.02a	0.0126575	0.00422083	<0.0001	0.016	0.013
	Basidiomycota		1.14205	1.18035	0.891909	0.92b	1.22a	1.07144	0.0891617	0.434	0.045	0.917
		Pleurotus	1.11201	1.13177	0.87721	0.905946	1.17471	1.04033	0.0860066	0.477	0.06	0.931
		unclassified Agaricales	0.03a	0.05a	0.00b	0.01b	0.04a	0.0269397	0.00648216	0.002	0.01	0.009
	Mucoromycota		0.512597	0.570305	0.563187	0.554855	0.542537	0.548696	0.0273094	0.433	0.928	0.008
		Hesseltinella	0.509126	0.569233	0.561445	0.552896	0.540307	0.546601	0.0273306	0.409	0.925	0.007
		Lichtheimia	0.0019534	0.000630448	0.00113654	0.00117365	0.00130661	0.00124013	0.000410959	0.334	0.714	0.792
	Ascomycota		0.01b	0.02b	0.24a	0.0345668	0.146794	0.0906805	0.0534107	0.006	0.341	0.344
		unclassified Sordariomycetes	0.00256654	0.00675245	0.0688728	0.00519845	0.0469294	0.0260639	0.0184687	0.206	0.188	0.131
		unclassified Ascomycota	0.00141256	0.0037628	0.0219127	0.00365248	0.0144062	0.00902936	0.00534604	0.094	0.281	0.306
		unclassified Microascales	0.000882308	0.0013798	0.0246419	0.00135422	0.0165818	0.00896799	0.00539281	0.079	0.072	0.235
		unclassified Microascaceae	0.0018526	0.00230174	0.0202134	0.00190357	0.0143416	0.00812258	0.00409812	0.185	0.081	0.285
	Chytridiomycota		0.01a	0.00b	0.01a	0.00594042	0.00534744	0.00564393	0.00117631	0.002	0.557	0.389
		unclassified Chytridiomycetes	0.01a	0.00b	0.01a	0.00594066	0.0053474	0.00564403	0.00117631	0.002	0.557	0.389
	unclassified fungi		0.61b	0.21b	1.81a	0.621202	1.13491	0.878055	0.198446	<0.0001	0.056	0.034
	Other Fungi		0.01b	0.00b	0.12a	0.0238245	0.0641223	0.0439734	0.0212715	<0.0001	0.446	0.262
other eukaryotes			0.00241827	0.000644794	0.00529879	0.00170014	0.00387442	0.00278728	0.001122	0.084	0.113	0.004
Note: P values were calculated based on arcsine square root transformed relative abundances among breeds and between low- and high-RFI steers using Mixed procedure in SAS. Values with different scripts within each row under the same experimental factor are different (P < 0.05).
